# Supplementary material for: Bacteriophage Cocktail-Mediated Inhibition of Pseudomonas aeruginosa Biofilm on Endotracheal Tube Surface
Source: MDPI journal article supplement (doi:10.3390/antibiotics10010078), 2021-01-15
Supplement: s1 [file s1]

**Table S1:** Residual aggregate biofilm ( $\mu\text{m}^2$ ) of *Pseudomonas aeruginosa* strains after 24 h in the presence of 5 different bacteriophages.

| Isolates      | Control                                 | vB_PaeM_USP_1                        | vB_PaeM_USP_2                         | vB_PaeM_USP_3                         | vB_PaeM_USP_18                        | vB_PaeM_USP_25                        |
|---------------|-----------------------------------------|--------------------------------------|---------------------------------------|---------------------------------------|---------------------------------------|---------------------------------------|
| Pa_Mi_1       | 40.47 (21.60; 57.49) <sup>Accl</sup>    | 60.11 (51.87; 65.26) <sup>Aa</sup>   | 46.49 (29.72; 72.96) <sup>Aabc</sup>  | 39.79 (14.40; 72.74) <sup>Aab</sup>   | 50.05 (29.61; 67.26) <sup>Aabc</sup>  | 59.62 (26.42; 81.46) <sup>Aab</sup>   |
| Pa_Mi_2       | 76.76 (34.60; 111.31) <sup>Abcd</sup>   | 27.65 (−13.68; 77.38) <sup>Aa</sup>  | 46.58 (25.27; 63.91) <sup>Aabc</sup>  | 73.59 (28.78; 101.60) <sup>Aab</sup>  | 39.37 (−6.53; 84.08) <sup>Abc</sup>   | 38.81 (−7.03; 92.35) <sup>Aab</sup>   |
| Pa_Mi_6       | 54.78 (8.51; 112.09) <sup>Accl</sup>    | 27.20 (−10.11; 78.25) <sup>Aa</sup>  | 48.08 (27.52; 65.34) <sup>Aabc</sup>  | 45.76 (−1.61; 109.34) <sup>Aab</sup>  | 35.15 (−2.79; 92.85) <sup>Aabc</sup>  | 35.35 (2.63; 71.07) <sup>Aab</sup>    |
| Pa_Mi_7       | 36.79 (11.91; 72.73) <sup>Accl</sup>    | 35.77 (−9.62; 66.13) <sup>Aa</sup>   | 41.16 (0.62; 72.68) <sup>Aabc</sup>   | 35.44 (27.14; 45.84) <sup>Aab</sup>   | 36.01 (16.48; 51.27) <sup>Abc</sup>   | 32.42 (29.32; 35.90) <sup>Aab</sup>   |
| Pa_Ba_164     | 132.97 (99.23; 157.03) <sup>Aabc</sup>  | 38.94 (31.32; 50.65) <sup>Ba</sup>   | 21.76 (−3.19; 45.74) <sup>Bac</sup>   | 35.94 (27.23; 44.52) <sup>Bab</sup>   | 24.9 (−31.88; 94.57) <sup>Bbc</sup>   | 23.49 (−2.36; 52.47) <sup>Bab</sup>   |
| Pa_Ba_168     | 83.34 (40.19; 112.66) <sup>Abcd</sup>   | 29.53 (19.33; 40.11) <sup>Aa</sup>   | 32.64 (14.95; 47.16) <sup>Aabc</sup>  | 30.01 (−12.71; 82.38) <sup>Aab</sup>  | 25.01 (12.25; 44.58) <sup>Abc</sup>   | 41.80 (5.05; 71.30) <sup>Aab</sup>    |
| Pa_Ba_169     | 79.36 (60.64; 99.78) <sup>Aabcd</sup>   | 22.97 (−13.50; 76.35) <sup>Aa</sup>  | 28.94 (18.52; 37.30) <sup>Aac</sup>   | 32.19 (1.55; 69.01) <sup>Aab</sup>    | 26.60 (−15.60; 78.37) <sup>Abc</sup>  | 25.08 (2.85; 60.40) <sup>Aab</sup>    |
| Pa_Trac_20    | 82.17 (45.13; 113.69) <sup>Aabcd</sup>  | 65.13 (5.95; 111.61) <sup>Aa</sup>   | 73.27 (10.94; 159.98) <sup>Aab</sup>  | 36.92 (−12.00; 108.94) <sup>Aab</sup> | 56.87 (24.29; 79.24) <sup>Aabc</sup>  | 68.72 (58.65; 82.26) <sup>Aab</sup>   |
| Pa_Trac_23    | 58.78 (33.43; 94.86) <sup>Abcd</sup>    | 51.90 (−3.40; 96.15) <sup>Aa</sup>   | 54.93 (43.60; 65.89) <sup>Aabc</sup>  | 28.29 (0.55; 57.10) <sup>Aab</sup>    | 39.36 (13.94; 66.02) <sup>Aabc</sup>  | 42.22 (12.32; 64.09) <sup>Aab</sup>   |
| Pa_Ren_1      | 79.18 (−9.75; 214.39) <sup>Aabcd</sup>  | 82.19 (31.41; 114.27) <sup>Aa</sup>  | 89.49 (22.36; 133.13) <sup>Aabc</sup> | 86.08 (47.86; 139.18) <sup>Aa</sup>   | 98.78 (84.58; 110.62) <sup>Aab</sup>  | 90.04 (80.97; 103.5) <sup>Aa</sup>    |
| Pa_ATCC 27853 | 94.37 (−0.69; 224.19) <sup>Aabcd</sup>  | 65.75 (56.05; 74.60) <sup>Aa</sup>   | 81.15 (25.50; 134.38) <sup>Aabc</sup> | 74.55 (58.31; 90.79) <sup>Aab</sup>   | 65.57 (38.67; 103.95) <sup>Aabc</sup> | 70.14 (0.22; 152.94) <sup>Aab</sup>   |
| Pa_ATCC 2108  | 155.51 (41.01; 272.10) <sup>Aa</sup>    | 52.55 (−32.85; 176.04) <sup>Ba</sup> | 66.95 (−121.08; 331.57) <sup>Ab</sup> | 64.44 (−7.26; 154.39) <sup>Bab</sup>  | 118.52 (18.66; 218.39) <sup>Aab</sup> | 36.58 (−56.18; 173.07) <sup>Bab</sup> |
| Pa_ATCC 2110  | 58.38 (−33.45; 161.42) <sup>Accl</sup>  | 7.84 (5.41; 9.59) <sup>Aa</sup>      | 17.98 (3.39; 27.68) <sup>Aac</sup>    | 5.84 (2.88; 8.94) <sup>Ab</sup>       | 4.12 (−2.29; 14.37) <sup>Ac</sup>     | 4.08 (−0.44; 10.03) <sup>Ab</sup>     |
| Pa_ATCC 2112  | 145.24 (124.48; 169.17) <sup>Aab</sup>  | 5.53 (−1.85; 16.08) <sup>Ba</sup>    | 8.86 (−0.74; 16.43) <sup>Bac</sup>    | 7.53 (1.50; 14.76) <sup>Bb</sup>      | 6.16 (−17.70; 43.24) <sup>Bc</sup>    | 7.74 (6.27; 8.96) <sup>Bb</sup>       |
| Pa_ATCC 2113  | 91.50 (−85.23; 318.70) <sup>Aabcd</sup> | 5.11 (−6.14; 22.41) <sup>Ba</sup>    | 6.80 (1.07; 11.31) <sup>Bc</sup>      | 4.88 (−34.26; 64.95) <sup>Bab</sup>   | 4.95 (−3.48; 14.55) <sup>Bc</sup>     | 3.69 (−23.64; 45.21) <sup>Bb</sup>    |

Residual aggregate biofilm was analyzed by multiple comparisons considering strains and bacteriophages in a Generalized Linear Model with Bonferroni correction. <sup>AB</sup> Different capital letters indicate statistically significant difference among bacteriophages. <sup>abcd</sup> Different small letters indicate statistically significant difference among strains.
