# Supplementary material for: Bacteriophage Cocktail-Mediated Inhibition of Pseudomonas aeruginosa Biofilm on Endotracheal Tube Surface
Source: MDPI journal article supplement (doi:10.3390/antibiotics10010078), 2021-01-15
Supplement: s1 [file s1]

**Table S2:** Biofilm-covered areas ( $\log_{10}\text{CFU}/\text{cm}^2$ ) of different *Pseudomonas aeruginosa* strains after 24, 48, 72, 96, 120, 144 and 168 h of culture in continuous flow, on the surface of endotracheal tubes, in the presence and absence of bacteriophage cocktail.

| Incubation time | Strain                     | Group                              |                                             |                                    |                                                  | p*                       |         |
|-----------------|----------------------------|------------------------------------|---------------------------------------------|------------------------------------|--------------------------------------------------|--------------------------|---------|
|                 |                            | Control                            |                                             | Bacteriophages cocktail            |                                                  |                          |         |
|                 |                            | Mean ± Standard Deviation (Median) | 95% Confidence interval (Minimum – Maximum) | Mean ± Standard Deviation (Median) | 95% Confidence interval (Minimum – Maximum)      |                          |         |
| 24 h            | <i>P. aeruginosa</i> 27853 | 6.47 ± 0.69 (6.75)                 | 5.75; 7.19 (5.08 – 6.85)                    | 4.67 ± 0.18 (4.75)                 | ] < 0.001 <sup>†</sup> ]<br>0.001 <sup>†</sup>   | 4.48; 4.87 (4.38 – 4.86) | < 0.001 |
|                 | <i>P. aeruginosa</i> 2110  | 6.33 ± 0.50 (6.21)                 | 5.80; 6.87 (5.71 – 7.20)                    | 6.54 ± 0.23 (6.56)                 |                                                  | 6.29; 6.79 (6.20 – 6.81) | 1.000   |
|                 | <i>P. aeruginosa</i> 2112  | 6.86 ± 0.20 (6.90)                 | 6.65; 7.07 (6.61 – 7.09)                    | 5.66 ± 0.51 (5.73)                 |                                                  | 5.13; 6.19 (4.90 – 6.20) | < 0.001 |
| 48 h            | <i>P. aeruginosa</i> 27853 | 7.40 ± 0.47 (7.23)                 | 6.91; 7.88 (6.86 – 8.14)                    | 6.97 ± 0.93 (7.12)                 |                                                  | 5.99; 7.95 (5.16 – 7.72) | 1.000   |
|                 | <i>P. aeruginosa</i> 2110  | 8.14 ± 0.24 (8.15)                 | 7.88; 8.39 (7.79 – 8.47)                    | 7.14 ± 0.15 (7.16)                 |                                                  | 6.90; 7.31 (6.95 – 7.33) | 0.004   |
|                 | <i>P. aeruginosa</i> 2112  | 7.69 ± 0.37 (7.68)                 | 7.29; 8.08 (7.26 – 8.12)                    | 6.58 ± 0.76 (6.59)                 |                                                  | 6.50; 6.66 (6.48 – 6.90) | 0.001   |
| 72 h            | <i>P. aeruginosa</i> 27853 | 7.64 ± 0.33 (7.72)                 | 7.29; 7.98 (7.11 – 7.98)                    | 7.05 ± 0.89 (6.83)                 | ] 0.017 <sup>†</sup> ]<br>< 0.001 <sup>†</sup>   | 6.12; 7.99 (5.88 – 8.26) | 0.627   |
|                 | <i>P. aeruginosa</i> 2110  | 8.03 ± 0.41 (8.01)                 | 7.60; 8.46 (7.45 – 8.70)                    | 7.70 ± 0.39 (7.66)                 |                                                  | 7.29; 8.12 (7.24 – 8.37) | 1.000   |
|                 | <i>P. aeruginosa</i> 2112  | 7.37 ± 0.30 (7.42)                 | 7.05; 7.68 (6.91 – 7.73)                    | 6.12 ± 0.42 (6.25)                 |                                                  | 5.68; 6.65 (5.30 – 6.45) | < 0.001 |
| 96 h            | <i>P. aeruginosa</i> 27853 | 7.66 ± 0.35 (7.68)                 | 7.19; 7.92 (7.11 – 7.94)                    | 7.56 ± 0.12 (7.46)                 | ] < 0.001 <sup>†</sup> ]<br>< 0.001 <sup>†</sup> | 7.43; 7.68 (7.41 – 7.76) | 1.000   |
|                 | <i>P. aeruginosa</i> 2110  | 7.97 ± 0.13 (8.04)                 | 7.84; 8.11 (7.80 – 8.08)                    | 7.79 ± 0.30 (7.72)                 |                                                  | 7.47; 8.10 (7.48 – 8.31) | 1.000   |
|                 | <i>P. aeruginosa</i> 2112  | 7.68 ± 0.28 (7.67)                 | 7.39; 7.97 (7.35 – 7.98)                    | 6.19 ± 0.72 (6.51)                 |                                                  | 5.43; 6.95 (4.90 – 6.86) | < 0.001 |
| 120 h           | <i>P. aeruginosa</i> 27853 | 7.97 ± 0.33 (8.01)                 | 7.63; 8.32 (7.38 – 8.37)                    | 7.13 ± 0.74 (6.91)                 | ] 0.003 <sup>†</sup> ]<br>< 0.001 <sup>†</sup>   | 6.35; 7.91 (6.29 – 8.12) | 0.035   |
|                 | <i>P. aeruginosa</i> 2110  | 7.85 ± 0.42 (8.02)                 | 7.41; 8.30 (7.12 – 8.21)                    | 8.16 ± 0.26 (8.20)                 |                                                  | 7.89; 8.43 (7.72 – 8.46) | 1.000   |
|                 | <i>P. aeruginosa</i> 2112  | 7.82 ± 0.24 (7.79)                 | 7.57; 8.08 (7.46 – 8.13)                    | 6.70 ± 0.65 (6.48)                 |                                                  | 6.02; 7.38 (6.24 – 7.95) | 0.001   |
| 144 h           | <i>P. aeruginosa</i> 27853 | 7.46 ± 0.38 (7.61)                 | 7.06; 7.86 (6.81 – 7.80)                    | 7.11 ± 0.78 (7.36)                 | ] 0.001 <sup>†</sup> ]<br>0.001 <sup>†</sup>     | 6.29; 7.93 (5.56 – 7.78) | 1.000   |
|                 | <i>P. aeruginosa</i> 2110  | 7.77 ± 0.59 (7.87)                 | 7.15; 8.40 (7.00 – 8.44)                    | 7.65 ± 0.39 (7.58)                 |                                                  | 7.24; 8.07 (7.12 – 8.26) | 1.000   |
|                 | <i>P. aeruginosa</i> 2112  | 8.05 ± 0.50 (8.15)                 | 7.53; 8.58 (7.45 – 8.73)                    | 6.38 ± 0.55 (6.44)                 |                                                  | 5.80; 6.95 (5.75 – 7.07) | < 0.001 |
| 168 h           | <i>P. aeruginosa</i> 27853 | 7.32 ± 0.57 (7.55)                 | 6.72; 7.92 (6.48 – 7.82)                    | 7.81 ± 0.40 (7.80)                 | ] < 0.001 <sup>†</sup> ]<br>< 0.001 <sup>†</sup> | 7.39; 8.22 (7.18 – 8.39) | 1.000   |
|                 | <i>P. aeruginosa</i> 2110  | 7.56 ± 0.72 (7.72)                 | 6.81; 8.31 (6.68 – 8.32)                    | 8.13 ± 0.36 (8.19)                 |                                                  | 7.75; 8.52 (7.72 – 8.66) | 0.706   |
|                 | <i>P. aeruginosa</i> 2112  | 8.00 ± 0.18 (7.99)                 | 7.81; 8.20 (7.73 – 8.26)                    | 6.22 ± 0.59 (6.17)                 |                                                  | 5.60; 6.84 (5.38 – 7.05) | < 0.001 |

Biofilm growth rates were analyzed by multiple comparisons considering strains and bacteriophages in a Generalized Linear Model with Bonferroni correction. \* It indicates p value for comparisons between control and bacteriophages cocktail. <sup>†</sup> It indicates p value for comparisons between strains.
