# Supplementary material for: Bacteriophage Cocktail-Mediated Inhibition of Pseudomonas aeruginosa Biofilm on Endotracheal Tube Surface
Source: MDPI journal article supplement (doi:10.3390/antibiotics10010078), 2021-01-15
Supplement: s1 [file s1]

**Table S3:** Respiratory activity (absorbance at 492 nm) of different *Pseudomonas aeruginosa* strains after 24, 48, 72, 96, 120, 144 and 168 h of culture in continuous flow, on the surface of endotracheal tubes, in the presence and absence of bacteriophage cocktail.

| Incubation time | Strain                     | Group                              |                                             |                                    |                                             |                      | p*                       |                          |
|-----------------|----------------------------|------------------------------------|---------------------------------------------|------------------------------------|---------------------------------------------|----------------------|--------------------------|--------------------------|
|                 |                            | Control                            |                                             | Bacteriophages cocktail            |                                             |                      |                          |                          |
|                 |                            | Mean ± Standard Deviation (Median) | 95% Confidence interval (Minimum – Maximum) | Mean ± Standard Deviation (Median) | 95% Confidence interval (Minimum – Maximum) |                      |                          |                          |
| 24 h            | <i>P. aeruginosa</i> 27853 | 0.02 ± 0.02 (0.02)                 | 0.025 <sup>†</sup>                          | 0.00; 0.04 (0.00 – 0.05)           | 0.04 ± 0.01 (0.05)                          | < 0.001 <sup>†</sup> | 0.03; 0.06 (0.02 – 0.06) | 0.050                    |
|                 | <i>P. aeruginosa</i> 2110  | 0.01 ± 0.01 (0.01)                 |                                             | 0.00; 0.02 (0.00 – 0.02)           | 0.00 ± 0.01 (0.00)                          |                      | 0.00; 0.01 (0.00 – 0.01) | 1.000                    |
|                 | <i>P. aeruginosa</i> 2112  | 0.05 ± 0.02 (0.05)                 |                                             | < 0.001 <sup>†</sup>               | 0.03; 0.06 (0.03 – 0.07)                    |                      | 0.07 ± 0.01 (0.07)       | < 0.001 <sup>†</sup>     |
| 48 h            | <i>P. aeruginosa</i> 27853 | 0.09 ± 0.03 (0.08)                 | 0.042 <sup>†</sup>                          | 0.06; 0.12 (0.07 – 0.15)           | 0.09 ± 0.03 (0.10)                          | 0.001 <sup>†</sup>   | 0.05; 0.12 (0.03 – 0.12) | 1.000                    |
|                 | <i>P. aeruginosa</i> 2110  | 0.09 ± 0.04 (0.08)                 |                                             | 0.04; 0.13 (0.04 – 0.16)           | 0.04 ± 0.03 (0.03)                          |                      | 0.01; 0.08 (0.02 – 0.11) | 0.394                    |
|                 | <i>P. aeruginosa</i> 2112  | 0.15 ± 0.04 (0.16)                 |                                             | 0.023 <sup>†</sup>                 | 0.11; 0.19 (0.10 – 0.20)                    |                      | 0.17 ± 0.02 (0.17)       | < 0.001 <sup>†</sup>     |
| 72 h            | <i>P. aeruginosa</i> 27853 | 0.14 ± 0.01 (0.14)                 | 0.007 <sup>†</sup>                          | 0.13; 0.15 (0.13 – 0.15)           | 0.20 ± 0.04 (0.21)                          | < 0.001 <sup>†</sup> | 0.16; 0.24 (0.14 – 0.25) | 0.049                    |
|                 | <i>P. aeruginosa</i> 2110  | 0.19 ± 0.03 (0.18)                 |                                             | 0.16; 0.22 (0.16 – 0.23)           | 0.11 ± 0.05 (0.09)                          |                      | 0.06; 0.16 (0.05 – 0.18) | 0.004                    |
|                 | <i>P. aeruginosa</i> 2112  | 0.21 ± 0.05 (0.19)                 |                                             | 0.16; 0.27 (0.17 – 0.31)           | 0.21 ± 0.02 (0.21)                          |                      | < 0.001 <sup>†</sup>     | 0.19; 0.23 (0.19 – 0.24) |
| 96 h            | <i>P. aeruginosa</i> 27853 | 0.24 ± 0.06 (0.25)                 | 0.008 <sup>†</sup>                          | 0.18; 0.30 (0.13 – 0.30)           | 0.27 ± 0.10 (0.30)                          | 0.001 <sup>†</sup>   | 0.17; 0.37 (0.10 – 0.36) | 1.000                    |
|                 | <i>P. aeruginosa</i> 2110  | 0.21 ± 0.04 (0.20)                 |                                             | 0.16; 0.25 (0.16 – 0.27)           | 0.12 ± 0.05 (0.10)                          |                      | 0.07; 0.17 (0.08 – 0.20) | 0.308                    |
|                 | <i>P. aeruginosa</i> 2112  | 0.33 ± 0.08 (0.34)                 |                                             | 0.25; 0.42 (0.20 – 0.43)           | 0.27 ± 0.04 (0.27)                          |                      | 0.001 <sup>†</sup>       | 0.23; 0.31 (0.22 – 0.32) |
| 120 h           | <i>P. aeruginosa</i> 27853 | 0.27 ± 0.04 (0.26)                 | 0.035 <sup>†</sup>                          | 0.23; 0.31 (0.23 – 0.32)           | 0.21 ± 0.06 (0.22)                          | 0.004 <sup>†</sup>   | 0.14; 0.27 (0.09 – 0.28) | 0.664                    |
|                 | <i>P. aeruginosa</i> 2110  | 0.28 ± 0.04 (0.27)                 |                                             | 0.24; 0.31 (0.24 – 0.33)           | 0.19 ± 0.06 (0.18)                          |                      | 0.13; 0.24 (0.12 – 0.28) | 0.059                    |
|                 | <i>P. aeruginosa</i> 2112  | 0.31 ± 0.07 (0.31)                 |                                             | 0.24; 0.38 (0.23 – 0.41)           | 0.30 ± 0.05 (0.31)                          |                      | 0.25; 0.35 (0.24 – 0.36) | 1.000                    |
| 144 h           | <i>P. aeruginosa</i> 27853 | 0.23 ± 0.07 (0.25)                 | 0.037 <sup>†</sup>                          | 0.16; 0.30 (0.15 – 0.30)           | 0.20 ± 0.09 (0.18)                          | 0.037 <sup>†</sup>   | 0.10; 0.29 (0.10 – 0.36) | 1.000                    |
|                 | <i>P. aeruginosa</i> 2110  | 0.25 ± 0.07 (0.24)                 |                                             | 0.18; 0.31 (0.16 – 0.32)           | 0.23 ± 0.02 (0.24)                          |                      | 0.21; 0.25 (0.20 – 0.25) | 1.000                    |
|                 | <i>P. aeruginosa</i> 2112  | 0.29 ± 0.04 (0.28)                 |                                             | 0.24; 0.33 (0.25 – 0.35)           | 0.24 ± 0.08 (0.26)                          |                      | 0.16; 0.32 (0.13 – 0.33) | 1.000                    |
| 168 h           | <i>P. aeruginosa</i> 27853 | 0.33 ± 0.03 (0.33)                 | 0.037 <sup>†</sup>                          | 0.30; 0.37 (0.29 – 0.38)           | 0.19 ± 0.05 (0.20)                          | 0.037 <sup>†</sup>   | 0.13; 0.25 (0.10 – 0.27) | 0.004                    |
|                 | <i>P. aeruginosa</i> 2110  | 0.27 ± 0.03 (0.27)                 |                                             | 0.23; 0.31 (0.22 – 0.32)           | 0.29 ± 0.03 (0.30)                          |                      | 0.26; 0.32 (0.23 – 0.32) | 1.000                    |
|                 | <i>P. aeruginosa</i> 2112  | 0.33 ± 0.12 (0.31)                 |                                             | 0.20; 0.45 (0.19 – 0.50)           | 0.31 ± 0.09 (0.30)                          |                      | 0.22; 0.40 (0.22 – 0.44) | 1.000                    |

Metabolic activity was analyzed by multiple comparisons considering strains and bacteriophages in a Generalized Linear Model with Bonferroni correction. \* It indicates p value for comparisons between control and bacteriophages cocktail. † It indicates p value for comparisons between strains.
